# Supplementary material for: Identification of Potential MHC Class-II-Restricted Epitopes Derived from Leishmania donovani Antigens by Reverse Vaccinology and Evaluation of Their CD4+ T-Cell Responsiveness against Visceral Leishmaniasis
Source: PubMed Central journal article supplement (PMC5735068; doi:10.3389/fimmu.2017.01763), 2017-12-14
Supplement: table_1.pdf [file table_1.pdf]

**TableS1:** Analysis of cross HLA binding of the selected peptides.

| Sl. No          | Protein-Id                                                                                                                                                                                                                                                                                        | Peptide         | HLA Cross-presentation                                                                                                                                                                                                                                                    | No. of cross binding HLA allele |
|-----------------|---------------------------------------------------------------------------------------------------------------------------------------------------------------------------------------------------------------------------------------------------------------------------------------------------|-----------------|---------------------------------------------------------------------------------------------------------------------------------------------------------------------------------------------------------------------------------------------------------------------------|---------------------------------|
| 1               | XP_003865112<br>.1                                                                                                                                                                                                                                                                                | QSKFRPISASSMPDE | HLA-DRB10101,HLA-DRB10401,HLA-DRB10404,HLA-DRB10405,HLA-DRB10701,HLA-DRB10802,HLA-DRB10901,HLA-DRB11101,HLA-DRB30101,HLA-DRB50101, HLA-DQA10501-DQB10301                                                                                                                  | 11                              |
|                 |                                                                                                                                                                                                                                                                                                   | IQSYRLLKDAVASPL | HLA-DRB10101,HLA-DRB10301,HLA-DRB10401,HLA-DRB10404,HLA-DRB10405,HLA-DRB10701,HLA-DRB10802,HLA-DRB10901,HLA-DRB11101,HLA-DRB11302,HLA-DRB11501,HLA-DRB40101,HLA-DRB50101,HLA-DPA10201-DPB10101,HLA-DPA10301-DPB10402, HLA-DQA10501-DQB10301                               | 16                              |
|                 |                                                                                                                                                                                                                                                                                                   | LQSFVVTCSAAALTL | HLA-DRB10101,HLA-DRB10401,HLA-DRB10404,HLA-DRB10405,HLA-DRB10701,HLA-DRB10802,HLA-DRB10901,HLA-DRB11101,HLA-DRB11302,HLA-DRB11501,HLA-DRB30101,HLA-DRB50101,HLA-DPA10103-DPB10401,HLA-DPA10103-DPB10201,HLA-DPA10301-DPB10402,HLA-DQA10102-DQB10602,HLA-DQA10501-DQB10301 | 17                              |
|                 |                                                                                                                                                                                                                                                                                                   | QSFVVTCSAAALTLA | HLA-DRB10101,HLA-DRB10401,HLA-DRB10404,HLA-DRB10405,HLA-DRB10701,HLA-DRB10802,HLA-DRB10901,HLA-DRB11101,HLA-DRB11302,HLA-DRB11501,HLA-DRB50101,HLA-DPA10103-DPB10401,HLA-DPA10103-DPB10201,HLA-DQA10102-DQB10602,HLA-DQA10501-DQB10301                                    | 15                              |
|                 |                                                                                                                                                                                                                                                                                                   | ALLQSFVVTCSAAAL | HLA-DRB10101,HLA-DRB10401,HLA-DRB10404,HLA-DRB10405,HLA-DRB10701,HLA-DRB10802,HLA-DRB10901,HLA-DRB11101,HLA-DRB11302,HLA-DRB11501,HLA-DRB30101, HLA-DPA10103-DPB10401,HLA-DPA10103-DPB10201,HLA-DPA10301-DPB10402,HLA-DQA10102-DQB10602,HLA-DQA10501-DQB10301             | 16                              |
|                 |                                                                                                                                                                                                                                                                                                   | 2               | XP_003862935<br>.1                                                                                                                                                                                                                                                        | ILDVIFMTSRLVAKM                 |
| LRRLFSIRTNALARE | HLA-DRB10101,HLA-DRB10301,HLA-DRB10401,HLA-DRB10404,HLA-DRB10405,HLA-DRB10701,HLA-DRB10802,HLA-DRB10901,HLA-DRB11101,HLA-DRB11302,HLA-DRB11501,HLA-DRB40101,HLA-DRB50101,HLA-DPA10201-DPB10101 ,HLA-DPA10301-DPB10402,HLA-DQA10102-DQB10602                                                       |                 |                                                                                                                                                                                                                                                                           | 16                              |
| FDLFLFSNGAVVWWG | HLA-DRB10101,HLA-DRB10401,HLA-DRB10404,HLA-DRB10405,HLA-DRB10701,HLA-DRB10901,HLA-DRB11101,HLA-DRB11302,HLA-DRB11501,HLA-DRB30101,HLA-DRB50101,HLA-DPA10103-DPB10201,HLA-DPA10201-DPB10101,HLA-DPA10103-HLA-DPB10301_DPB10401,HLA-DPA10301-DPB10402 , HLA-DQA10102-DQB10602,HLA-DQA10501-DQB10301 |                 |                                                                                                                                                                                                                                                                           | 17                              |
| TLGFQPLAVEPALDR | HLA-DRB10101,HLA-DRB10401,HLA-DRB10404,HLA-DRB10405,HLA-DRB10802,HLA-DRB10901,HLA-DRB40101,HLA-DRB50101, HLA-DPA10201-DPB10101,HLA-DQA10102-DQB10602,HLA-DQA10301-DQB10302,HLA-DQA10401-DQB10402,HLA-DQA10501-DQB10201,HLA-DQA10501-DQB10301                                                      |                 |                                                                                                                                                                                                                                                                           | 14                              |
| NCFDLFLFSNGAVVW | HLA-DRB10101,HLA-DRB10401,HLA-DRB10404<br>HLA-DRB10405,HLA-DRB10701,HLA-DRB10901,HLA-DRB11101,HLA-DRB11302,HLA-DRB11501,HLA-DRB30101,HLA-DPA10103-DPB10401,HLA-DPA10103-DPB10201,HLA-DPA10201-DPB10101,HLA-DPA10103-HLA-DPB10301_DPB10401,HLA-DPA10301-DPB10402 ,HLA-DQA10501-DQB10301            |                 |                                                                                                                                                                                                                                                                           | 16                              |
| RVRLRRLFSIRTNAL | HLA-DRB10101,HLA-DRB10401,HLA-DRB10404,HLA-DRB10405<br>HLA-DRB10701,HLA-DRB10802,HLA-DRB10901,HLA-DRB11101,HLA-                                                                                                                                                                                   |                 |                                                                                                                                                                                                                                                                           | 14                              |

|   |                    |                 |                                                                                                                                                                                                                                                                                                                                                                                                              |    |
|---|--------------------|-----------------|--------------------------------------------------------------------------------------------------------------------------------------------------------------------------------------------------------------------------------------------------------------------------------------------------------------------------------------------------------------------------------------------------------------|----|
|   |                    |                 | DRB11302,HLA-DRB11501,HLA-DRB40101,HLA-DRB50101,HLA-DPA10201-DPB10101,HLA-DPA10301-DPB10402                                                                                                                                                                                                                                                                                                                  |    |
| 3 | XP_003863<br>771.1 | LLALILGGIGAVGY  | HLA-DRB10101, HLA-DRB10404, HLA-DRB10901, HLA-DRB11501, HLA-DQA10501-DQB10301                                                                                                                                                                                                                                                                                                                                | 5  |
|   |                    | YPVYPFLASNAALLN | HLA-DRB10101, HLA-DRB10301, HLA-DRB10401, HLA-DRB10404, HLA-DRB10405, HLA-DRB10701, HLA-DRB10802, HLA-DRB10901, HLA-DRB11101, HLA-DRB11302, HLA-DRB11501, HLA-DRB30101, HLA-DRB50101,HLA-DPA10103-DPB10401, HLA-DPA10103-DPB10201, HLA-DPA10201-DPB10101, HLA-DPA10103-HLA-DPB10301_DPB10401, HLA-DPA10301-DPB10402,HLA-DQA10102-DQB10602,HLA-DQA10401-DQB10402, HLA-DQA10501-DQB10201,HLA-DQA10501-DQB10301 | 22 |
|   |                    | LPSFHAMSAFHSAAK | HLA-DRB10101, HLA-DRB10401, HLA-DRB10404, HLA-DRB10405, HLA-DRB10701, HLA-DRB10901, HLA-DRB11101,HLA-DRB11501, HLA-DRB40101, HLA-DRB50101, HLA-DQA10102-DQB10602, HLA-DQA10501-DQB10301,                                                                                                                                                                                                                     | 12 |
|   |                    | NAALLNLIPSLLYRV | HLA-DRB10101,HLA-DRB10301,HLA-DRB10401,HLA-DRB10404,HLA-DRB10405,HLA-DRB10701,HLA-DRB10802,HLA-DRB10901,HLA-DRB11101,HLA-DRB11302,HLA-DRB11501,HLA-DRB40101,HLA-DRB50101,HLA-DPA10103-DPB10401,HLA-DPA10103-DPB10201, HLA-DPA10201-DPB10101,HLA-DPA10103-HLA-DPB10301_DPB10401, HLA-DPA10301-DPB10402, HLA-DQA10102-DQB10602,                                                                                | 19 |
|   |                    | VYPFLASNAALLNLI | HLA-DRB10101,HLA-DRB10301,HLA-DRB10401,HLA-DRB10404,HLA-DRB10405,HLA-DRB10701,HLA-DRB10901,HLA-DRB11101,HLA-DRB11302,HLA-DRB11501, HLA-DRB30101, HLA-DRB50101, HLA-DPA10103-DPB10401,HLA-DPA10103-DPB10201,HLA-DPA10201-DPB10101,HLA-DPA10301-DPB10402,HLA-DQA10102-DQB10602, HLA-DQA10501-DQB10201, HLA-DQA10501-DQB10301                                                                                   | 19 |
|   |                    | RALLALILGGIGAV  | HLA-DRB10101, HLA-DRB10404, HLA-DRB11501, HLA-DPA10301-DPB10402, HLA-DQA10501-DQB10301                                                                                                                                                                                                                                                                                                                       | 5  |
|   |                    | AALLNLIPSLLYRVQ | HLA-DRB10101,HLA-DRB10301,HLA-DRB10401,HLA-DRB10404,HLA-DRB10405,HLA-DRB10701,HLA-DRB10802,HLA-DRB10901,HLA-DRB11101,HLA-DRB11302,HLA-DRB11501,HLA-DRB40101,HLA-DRB50101,HLA-DPA10103-DPB10401,HLA-DPA10103-DPB10201,HLA-DPA10201-DPB10101,HLA-DPA10201-DPB10501,HLA-DPA10103-HLA-DPB10301_DPB10401, HLA-DPA10301-DPB10402, HLA-DQA10102-DQB10602                                                            | 20 |
| 4 | XP_003858<br>976.1 | LQVFTAICASFAHGA | HLA-DRB10101,HLA-DRB10401,HLA-DRB10404,HLA-DRB10405,HLA-DRB10701,HLA-DRB10802,HLA-DRB10901,HLA-DRB11101,HLA-DRB11501,HLA-DRB50101,HLA-DQA10102-DQB10602,HLA-DQA10501-DQB10301                                                                                                                                                                                                                                | 12 |
|   |                    | FPFFSGVAPIVASWF | HLA-DRB10101,HLA-DRB10401,HLA-DRB10404,HLA-DRB10405,HLA-DRB10701,HLA-DRB10802,HLA-DRB10901,HLA-DRB11101,HLA-DRB11302,HLA-DQA10102-DQB10602,HLA-DQA10501-DQB10201,HLA-DQA10501-DQB10301,                                                                                                                                                                                                                      | 12 |
|   |                    | ERVFRYLQVFTAICA | HLA-DRB10101,HLA-DRB10401,HLA-DRB10404,HLA-DRB10405,HLA-DRB10701,HLA-DRB10802,HLA-DRB11101,HLA-DRB11501,HLA-DRB40101,HLA-DRB50101,HLA-DPA10103-DPB10401,HLA-DPA10103-DPB10201,HLA-DPA10201-DPB10101,HLA-DPA10201-DPB10501,HLA-DPA10103-HLA-DPB10301_DPB10401,HLA-DPA10301-DPB10402,HLA-DQA10102-DQB10602,HLA-DQA10501-DQB10301                                                                               | 18 |
|   |                    | KDDFFPFGVAPIVA  | HLA-DRB10101,HLA-DRB10401,HLA-DRB10404,HLA-DRB10405,HLA-DRB10701,HLA-DRB10901,HLA-DRB11101,HLA-DRB11302,HLA-DRB11501,HLA-DPA10103-DPB10201,HLA-DQA10501-DQB10201,HLA-DQA10501-DQB10301                                                                                                                                                                                                                       | 12 |
|   |                    | DFPFFSGVAPIVASW | HLA-DRB10101,HLA-DRB10401,HLA-DRB10404,HLA-DRB10405,HLA-DRB10701,HLA-DRB10901,HLA-DRB11101,HLA-DRB11302,HLA-DRB11501,HLA-DQA10102-DQB10602,HLA-DQA10501-DQB10301                                                                                                                                                                                                                                             | 11 |
|   |                    | LESFFVLKFGASKRL | HLA-DRB10101,HLA-DRB10401,HLA-DRB10404,HLA-DRB10405,HLA-DRB10701,HLA-DRB10901,HLA-DRB11101,HLA-DRB11501,HLA-DRB50101,HLA-DPA10103-DPB10201,HLA-DPA10201-DPB10101,HLA-DPA10201-DPB10501,HLA-DPA10103-HLA-DPB10301_DPB10401,HLA-DPA10301-DPB10402,HLA-DQA10501-DQB10301                                                                                                                                        | 15 |
|   |                    | FFVLKFGASKRLKWS | HLA-DRB10101,HLA-DRB10401,HLA-DRB10404,HLA-DRB10405,HLA-DRB10701,HLA-DRB10901,HLA-DRB11101,HLA-DRB11501,HLA-DRB50101,HLA-DPA10201-DPB10101,HLA-DPA10201-DPB10501,HLA-DPA10301-DPB10402,HLA-DQA10501-DQB10301,                                                                                                                                                                                                | 13 |
|   |                    | FRYLQVFTAICASFA | HLA-DRB10101,HLA-DRB10401,HLA-DRB10404,HLA-DRB10405, HLA-DRB10701,HLA-DRB10802,HLA-DRB10901,HLA-DRB11101,HLA-                                                                                                                                                                                                                                                                                                | 18 |

|   |                    |                 |                                                                                                                                                                                                                                                                                                                                                                                          |    |
|---|--------------------|-----------------|------------------------------------------------------------------------------------------------------------------------------------------------------------------------------------------------------------------------------------------------------------------------------------------------------------------------------------------------------------------------------------------|----|
|   |                    |                 | DRB11501,HLA-DRB50101,HLA-DPA10103-DPB10401,HLA-DPA10103-DPB10201,HLA-DPA10201-DPB10101,HLA-DPA10201-DPB10501,HLA-DPA10103-HLA-DPB10301_DPB10401 ,HLA-DPA10301-DPB10402,HLA-DQA10102-DQB10602,HLA-DQA10501-DQB10301                                                                                                                                                                      |    |
|   |                    | SRGFSAELSAALVVS | HLA-DRB10101,HLA-DRB10301,HLA-DRB10401,HLA-DRB10405,HLA-DRB10701,HLA-DRB10901,HLA-DRB11501,HLA-DRB30101,HLA-DRB50101,HLA-DPA10301-DPB10402,HLA-DQA10102-DQB10602,HLA-DQA10301-DQB10302,HLA-DQA10401-DQB10402,HLA-DQA10501-DQB10301                                                                                                                                                       | 14 |
|   |                    | RGFSAELSAALVVSF | HLA-DRB10101,HLA-DRB10401,HLA-DRB10405,HLA-DRB10701,HLA-DRB10901,HLA-DRB11501,HLA-DRB30101,HLA-DRB50101,HLA-DPA10301-DPB10402,HLA-DQA10102-DQB10602,HLA-DQA10301-DQB10302,HLA-DQA10401-DQB10402,HLA-DQA10501-DQB10301                                                                                                                                                                    | 13 |
| 5 | XP_003857<br>910.1 | LALLIMLYALIATQF | HLA-DRB10101,HLA-DRB10401,HLA-DRB10404,HLA-DRB10405,HLA-DRB10701,HLA-DRB10802,HLA-DRB10901,HLA-DRB11501,HLA-DRB50101,HLA-DPA10103-DPB10201,HLA-DPA10201-DPB10101,HLA-DPA10301-DPB10402,HLA-DQA10101-DQB10501,HLA-DQA10102-DQB10602,HLA-DQA10301-DQB10302,HLA-DQA10401-DQB10402,HLA-DQA10501-DQB10201,HLA-DQA10501-DQB10301                                                               | 18 |
|   |                    | LIMLYALIATQFSDD | HLA-DRB10101,HLA-DRB10401,HLA-DRB10404,HLA-DRB10405,HLA-DRB10701,HLA-DRB10802,HLA-DRB10901,HLA-DRB11101,HLA-DRB11501,HLA-DRB40101,HLA-DRB50101,HLA-DPA10103-DPB10401,HLA-DPA10103-DPB10201,HLA-DPA10201-DPB10101,HLA-DPA10103-HLA-DPB10301_DPB10401,HLA-DPA10301-DPB10402,HLA-DQA10102-DQB10602,HLA-DQA10301-DQB10302,HLA-DQA10401-DQB10402,HLA-DQA10501-DQB10201,HLA-DQA10501-DQB10301  | 21 |
|   |                    | IMLYALIATQFSDDA | HLA-DRB10101,HLA-DRB10401,HLA-DRB10404,HLA-DRB10405,HLA-DRB10701,HLA-DRB10802,HLA-DRB10901,HLA-DRB11101,HLA-DRB11501,HLA-DRB40101,HLA-DRB50101,HLA-DPA10103-DPB10401,HLA-DPA10103-DPB10201,HLA-DPA10201-DPB10101,HLA-DPA10103-HLA-DPB10301_DPB10401 ,HLA-DPA10301-DPB10402,HLA-DQA10102-DQB10602,HLA-DQA10301-DQB10302,HLA-DQA10401-DQB10402,HLA-DQA10501-DQB10201,HLA-DQA10501-DQB10301 | 21 |
|   |                    | VSVLALLIMLYALIA | HLA-DRB10101,HLA-DRB10404,HLA-DRB10405,HLA-DRB11501,HLA-DPA10103-HLA-DPB10301_DPB10401,HLA-DPA10301-DPB10402                                                                                                                                                                                                                                                                             | 6  |
|   |                    | VLALLIMLYALIATQ | HLA-DRB10101HLA-DRB10404HLA-DRB10405HLA-DRB11501HLA-DPA10103-DPB10201,HLA-DPA10301-DPB10402,HLA-DQA10102-DQB10602,HLA-DQA10401-DQB10402,HLA-DQA10501-DQB10301                                                                                                                                                                                                                            | 9  |
| 6 | XP_003858<br>984.1 | VSILRQLLSVTAHTH | HLA-DRB10101,HLA-DRB10401,HLA-DRB10404,HLA-DRB10405,HLA-DRB10701,HLA-DRB10802,HLA-DRB10901,HLA-DRB11101,HLA-DRB11501,HLA-DRB40101,HLA-DRB50101,HLA-DPA10201-DPB10101,HLA-DPA10301-DPB10402,HLA-DQA10102-DQB10602                                                                                                                                                                         | 14 |
|   |                    | KVAVSILRQLLSVTA | HLA-DRB10101,HLA-DRB10301,HLA-DRB10401,HLA-DRB10404,HLA-DRB10405,HLA-DRB10701,HLA-DRB10802,HLA-DRB10901,HLA-DRB11101,HLA-DRB11501,HLA-DRB40101,HLA-DRB50101,HLA-DPA10103-DPB10401,HLA-DPA10103-DPB10201,HLA-DPA10201-DPB10101,HLA-DPA10201-DPB10501,HLA-DPA10103-HLA-DPB10301_DPB10401,HLA-DPA10301-DPB10402,HLA-DQA10102-DQB10602                                                       | 19 |
|   |                    | GISFSRAFAANIESA | HLA-DRB10101,HLA-DRB10401,HLA-DRB10404,HLA-DRB10405,HLA-DRB10701,HLA-DRB10802,HLA-DRB10901,HLA-DRB11101,HLA-DRB11302,HLA-DRB11501,HLA-DRB50101,HLA-DQA10102-DQB10602,HLA-DQA10301-DQB10302,HLA-DQA10401-DQB10402,HLA-DQA10501-DQB10301                                                                                                                                                   | 15 |
|   |                    | YQFYHRARSYVIFTT | HLA-DRB10101,HLA-DRB10401,HLA-DRB10404,HLA-DRB10405,HLA-DRB10701,HLA-DRB10901,HLA-DRB11101,HLA-DRB11501,HLA-DRB50101,HLA-DQA10501-DQB10301                                                                                                                                                                                                                                               | 10 |
